# Supplementary material for: Neuronal Calcium Sensor-1 Protects Cortical Neurons from Hyperexcitation and Ca2+ Overload during Ischemia by Protecting the Population of GABAergic Neurons
Source: MDPI journal article supplement (doi:10.3390/ijms232415675), 2022-12-10
Supplement: s1 [file s1]

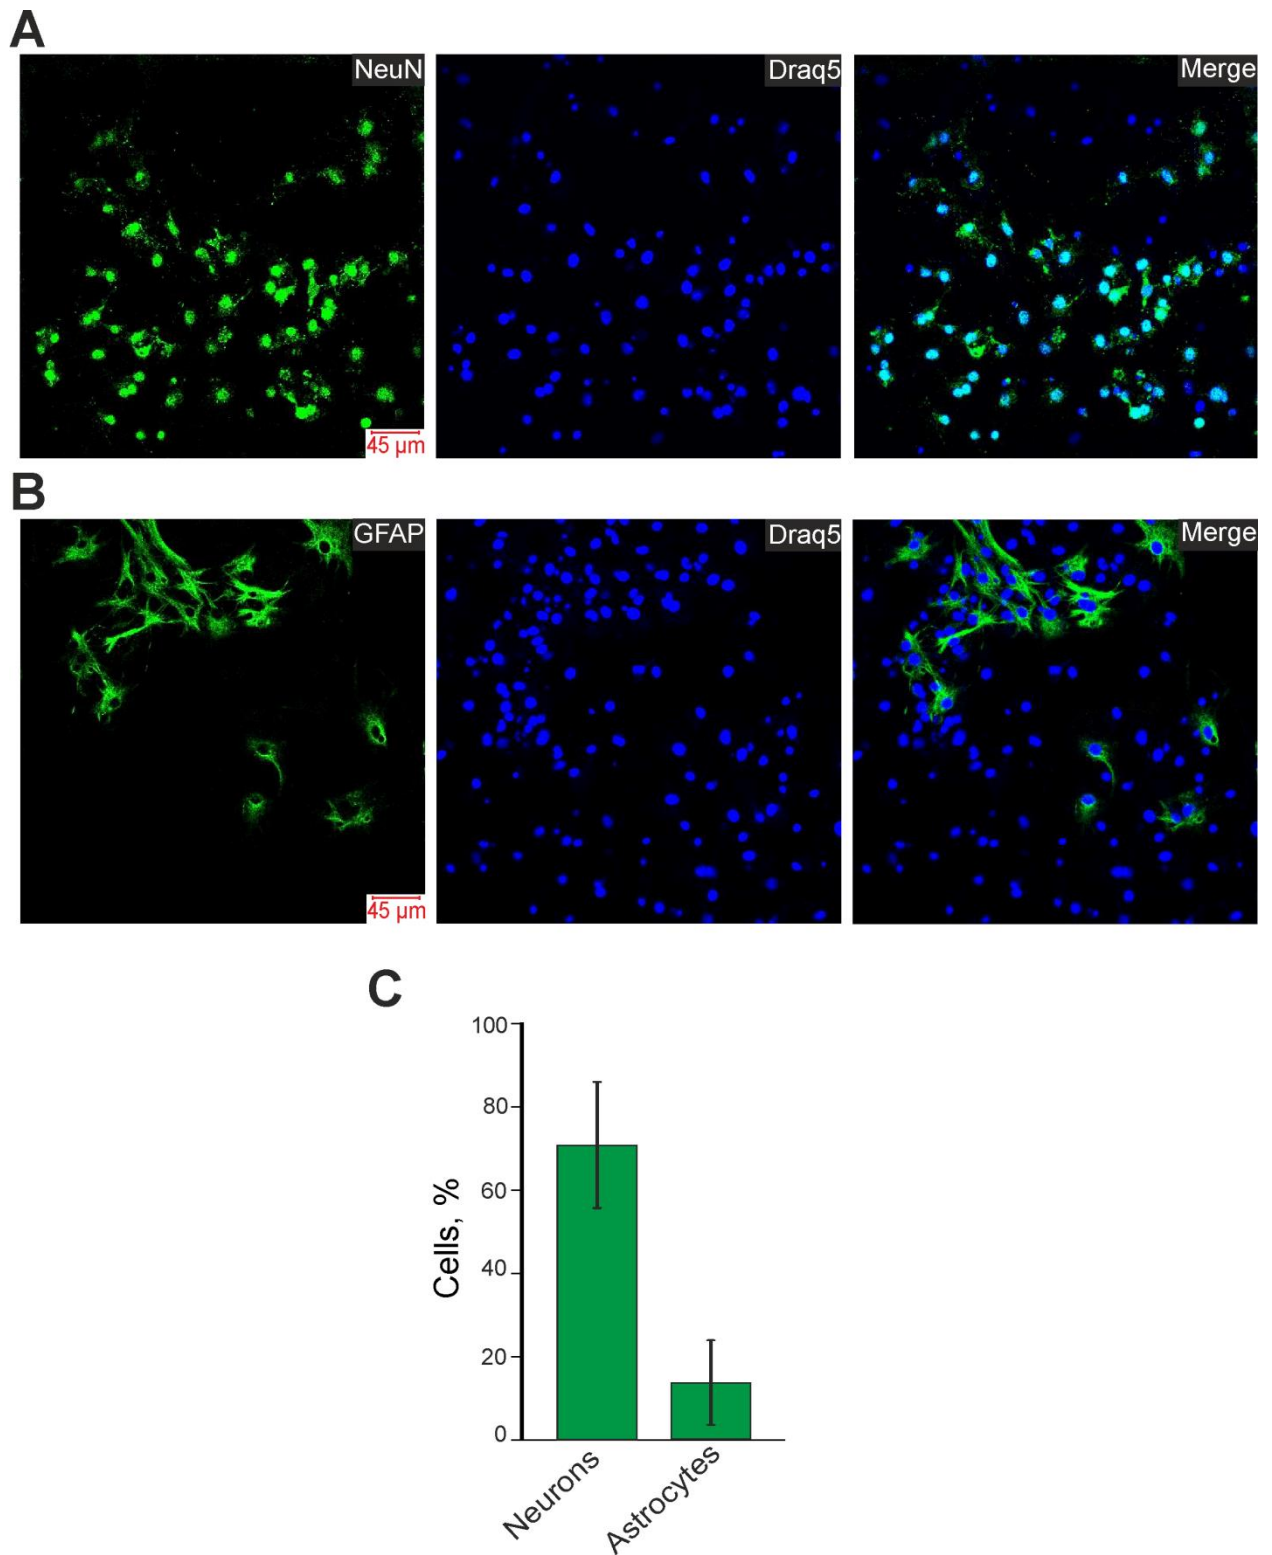

**Supplementary Figure S1.** Immunocytochemical staining of mouse cortical cells with antibodies against NeuN ((**A**), neuronal marker) and GFAP ((**B**), astrocytic marker). Cell nuclei were stained with Draq5. C - The number of neurons (NeuN positive cells) and astrocytes (GFAP positive cells) in cultured mouse cortical cells. The number of nuclei was taken as 100% (Draq5 stain).
